# Supplementary material
Source: ML conference proceedings conference paper supplement (https://openreview.net/forum?id=LemVOgJ4yP)
Supplement: supplementary_material [file attachment]

# Learning to Cooperate and Communicate Over Imperfect Channels

This is the official implementation of *Learning to Cooperate and Communicate Over Imperfect Channels*.

We investigate unreliable communication in multi-agent reinforcement learning and propose an adaptive message size selection that enables agents to use a limited (and unreliable) communication channel more efficiently.

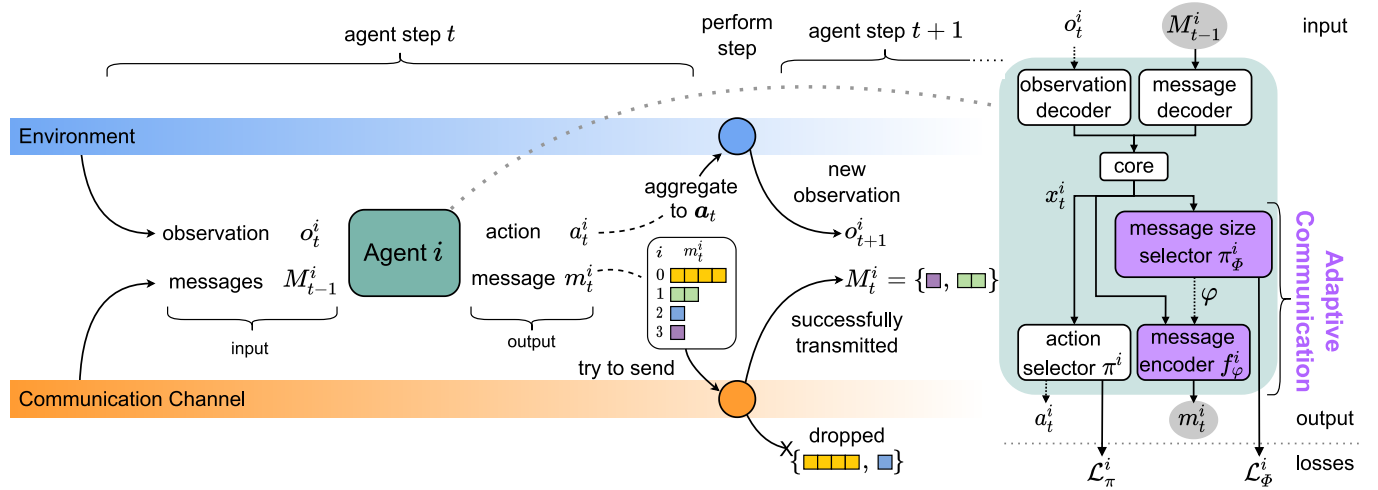

Submitted as supplementary material to the Eleventh International Conference on Learning Representations (ICLR 2023). Do not distribute.

The code is provided "as is", further refactoring and cleanup may be conducted before official release.

## Requirements

This project uses Python and PyTorch. We recommend working with a virtual python environment and use [miniconda](#) in the following.

1. Create an environment for the project and activate it

```
conda create -n myenv python=3.8
conda activate myenv
```

2. [Optional] Install PyTorch with GPU support, see <https://pytorch.org/get-started/locally/>
3. Install the remaining requirements

```
pip install -r requirements.txt
```

4. [Windows] The traffic junction environment depends on the standard Python curses module. Windows OS users can install it as follows

```
pip install windows-curses
```

5. Set the `PYTHONPATH` environment variable to the root of this project

## Experiments

To train and evaluate the models used in the paper, we provide the following experiment configurations in `experiments/configs`:

- `paper_pomnist_c8_adaptation.yaml`: Adaptive Communication in a channel size of 8 (main results).
- `paper_pomnist_c8_random_size.yaml`: Ablation with random message size selection.
- `paper_pomnist_c8_zero_content.yaml`: Ablation with message size selection but zero content.
- `paper_pomnist_c_sizes.yaml`: Adaptive communication with different channel sizes.
- `paper_pomnist_baseline_num_agents.yaml`: POMNIST without communication and different environment splits (see appendix).
- `paper_pomnist_baseline_single_msg_sizes.yaml`: POMNIST with (1, 1) splits and different message sizes (see appendix).
- `paper_tj_adaptive.yaml`: Adaptive communication (with/without random selection) in the traffic junction environment over an imperfect channel.
- `paper_tj_baseline.yaml`: Traffic junction baseline with perfect channel.
- `paper_tj_fixed`: Traffic junction with fixed message sizes in an imperfect channel.

Selected experiments can be run with

```
python experiments/run_experiment.py --config-  
file=experiments/configs/selected_config.yaml
```

This will start the runs for this configuration. All models are evaluated directly after training.

The following results will be put into a new subdirectory of `./runs`:

- Tensorboard training logs for the individual runs, updated during training
- Pickle dumps with statistics for each training step and the evaluation
- A plot of selected aggregated metrics (mean return by default)
- A `metrics_table.csv` file that contains the aggregated metrics for all runs

## Manual Training and Evaluation

Manual experiments can be performed by modifying and running `main.py`:

```
python main.py
```

Example configurations are located at the bottom of the script.

## Results

We include the aggregated evaluation results used in the paper in the `results` directory.

The evaluation figures from the paper can be recreated by running

```
python experiments/create_pomnist_paper_figs.py
```

## Contributors

Anonymous authors.
